# Supplementary material for: Degradation of Sodium Acetate by Catalytic Ozonation Coupled with a Mn-Functionalized Fly Ash: Reaction Parameters and Mechanism
Source: MDPI journal article supplement (doi:10.3390/toxics11080700), 2023-08-14
Supplement: s1 [file s1]

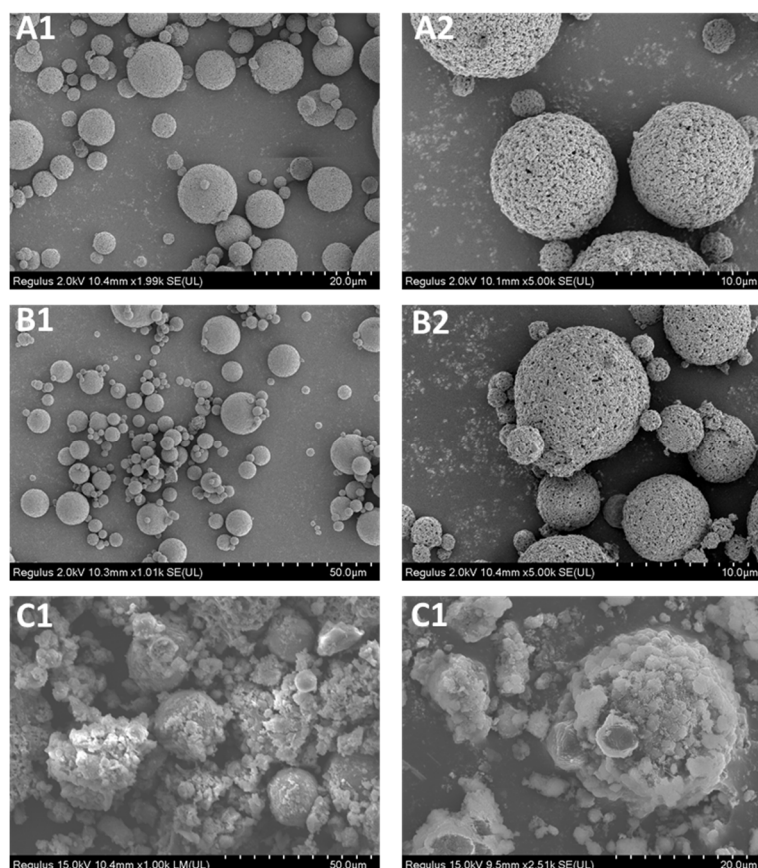

**Figure S1.** SEM images of (A1-A2) Mn<sub>0.08</sub>/CFA, (B1-B2) Mn<sub>0.08</sub>/CFA(A), and (C1-C2) Mn<sub>0.08</sub>/CFA(A+B).

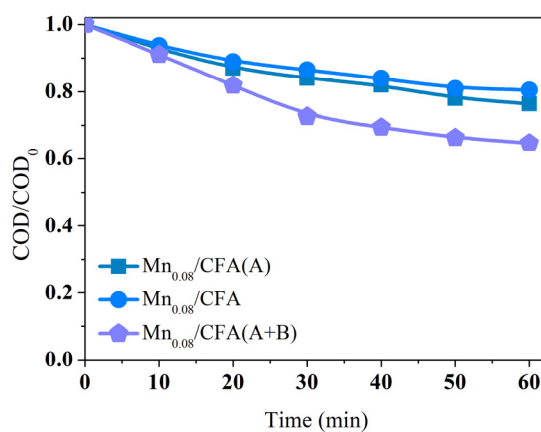

**Figure S2.** The degradation performance of sodium acetate over catalysts Mn<sub>0.08</sub>/CFA(A+B), Mn<sub>0.08</sub>/CFA(A), and Mn<sub>0.08</sub>/CFA (reaction condition: ozone concentration = 37 mg/L, temperature = 25 °C, pH = 10.8 and catalyst amount = 2 g/L).
